# Supplementary material for: Chronic Strongyloides stercoralis infection in Fijian migrants to the UK
Source: PubMed Central journal article supplement (PMC11556407; doi:10.1099/jmm.0.001925), 2024-11-12
Supplement: jmm-73-01925-s001.pdf [file jmm-73-01925-s001.pdf]

## Supplementary Material

Supplementary figure 1. Histograms of age (A) and years since migration to the UK (B).

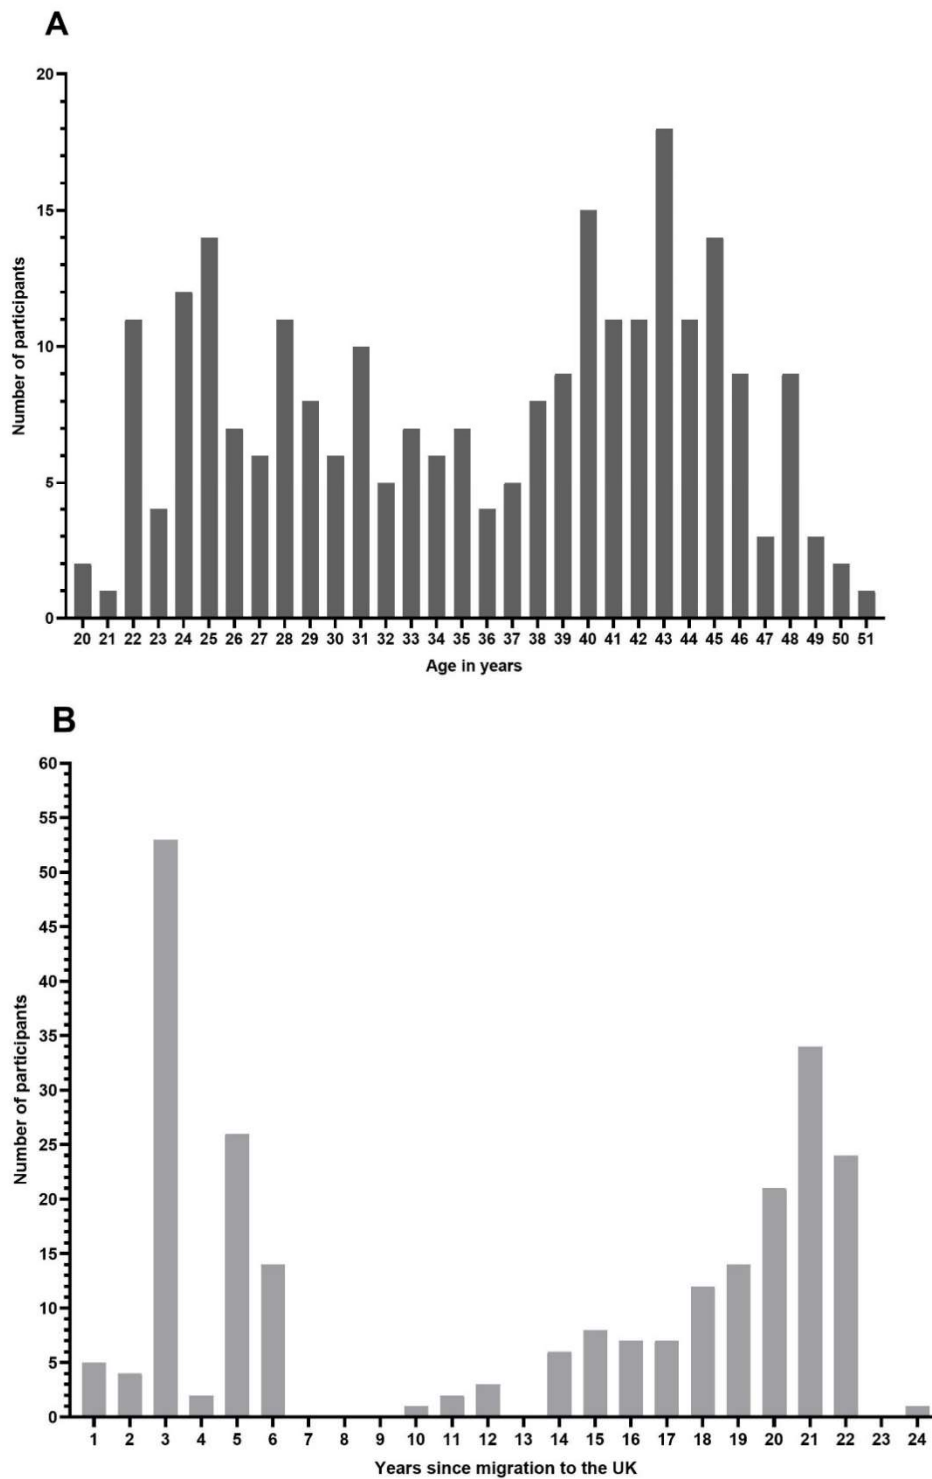

**Supplementary figure 2. Map of participant *Strongyloides stercoralis* IgG ELISA seropositivity by primary area of residence in Fiji.** Number of participant and percentage IgG positive are shown for each Division (Central, Eastern, Northern, Western) and for each province.

| Western Division                                        |    |               |                      |
|---------------------------------------------------------|----|---------------|----------------------|
| N = 49                                                  |    |               |                      |
| S. <i>Stercoralis</i> IgG ELISA seropositivity = 40.81% |    |               |                      |
| Province                                                | N  | IgG ELISA +ve | % IgG ELISA positive |
| Ba                                                      | 33 | 12            | 36.40                |
| Ra                                                      | 4  | 3             | 75.00                |
| Nadroga-Navosa                                          | 12 | 1             | 41.70                |

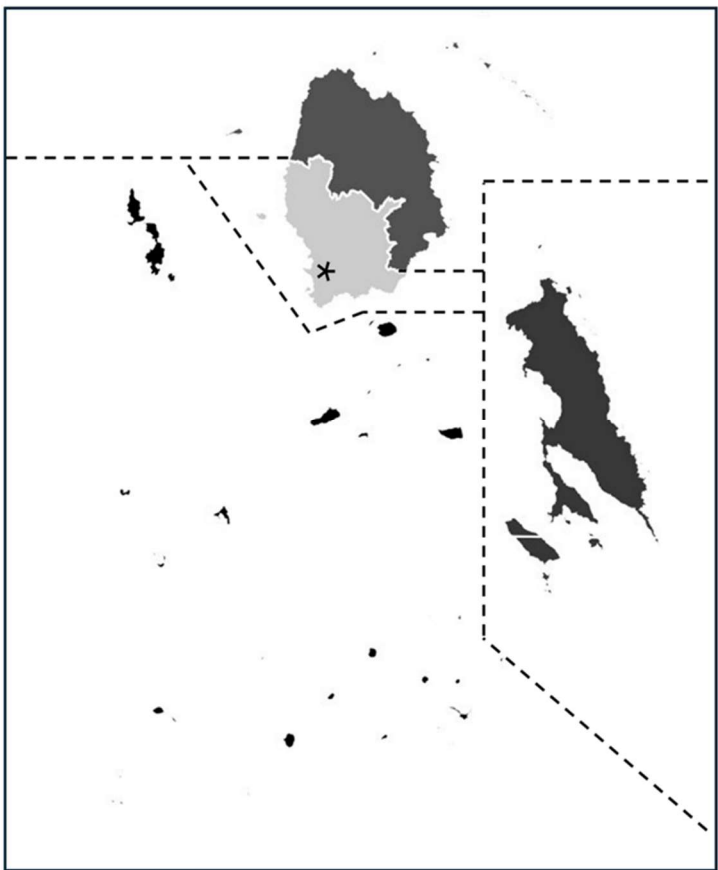

| Northern Division                                       |    |               |                      |
|---------------------------------------------------------|----|---------------|----------------------|
| N = 14                                                  |    |               |                      |
| S. <i>Stercoralis</i> IgG ELISA seropositivity = 42.86% |    |               |                      |
| Province                                                | N  | IgG ELISA +ve | % IgG ELISA positive |
| Calakaudrove                                            | 10 | 5             | 50.00                |
| Macuata                                                 | 3  | 0             | 00.00                |
| Bua                                                     | 1  | 1             | 100.00               |

| Eastern Division                                        |   |               |                      |
|---------------------------------------------------------|---|---------------|----------------------|
| N = 17                                                  |   |               |                      |
| S. <i>Stercoralis</i> IgG ELISA seropositivity = 47.06% |   |               |                      |
| Province                                                | N | IgG ELISA +ve | % IgG ELISA positive |
| Kadavu                                                  | 7 | 3             | 42.85                |
| Lomaviti                                                | 6 | 3             | 50.00                |
| Lau                                                     | 4 | 2             | 50.70                |

| Central Division                                        |     |               |                      |
|---------------------------------------------------------|-----|---------------|----------------------|
| N = 164                                                 |     |               |                      |
| S. <i>Stercoralis</i> IgG ELISA seropositivity = 31.70% |     |               |                      |
| Province                                                | N   | IgG ELISA +ve | % IgG ELISA positive |
| Rewa                                                    | 101 | 28            | 27.72                |
| Tallevu                                                 | 33  | 15            | 45.50                |
| Naitasiri                                               | 14  | 3             | 21.40                |
| Serua                                                   | 13  | 4             | 30.80                |
| Namosi                                                  | 3   | 2             | 66.70                |

**Supplementary figure 3. ROC curves for eosinophil count prediction of faecal positivity for *S. stercoralis*, hookworm, or both helminths combined. AUC = Area under the curve**

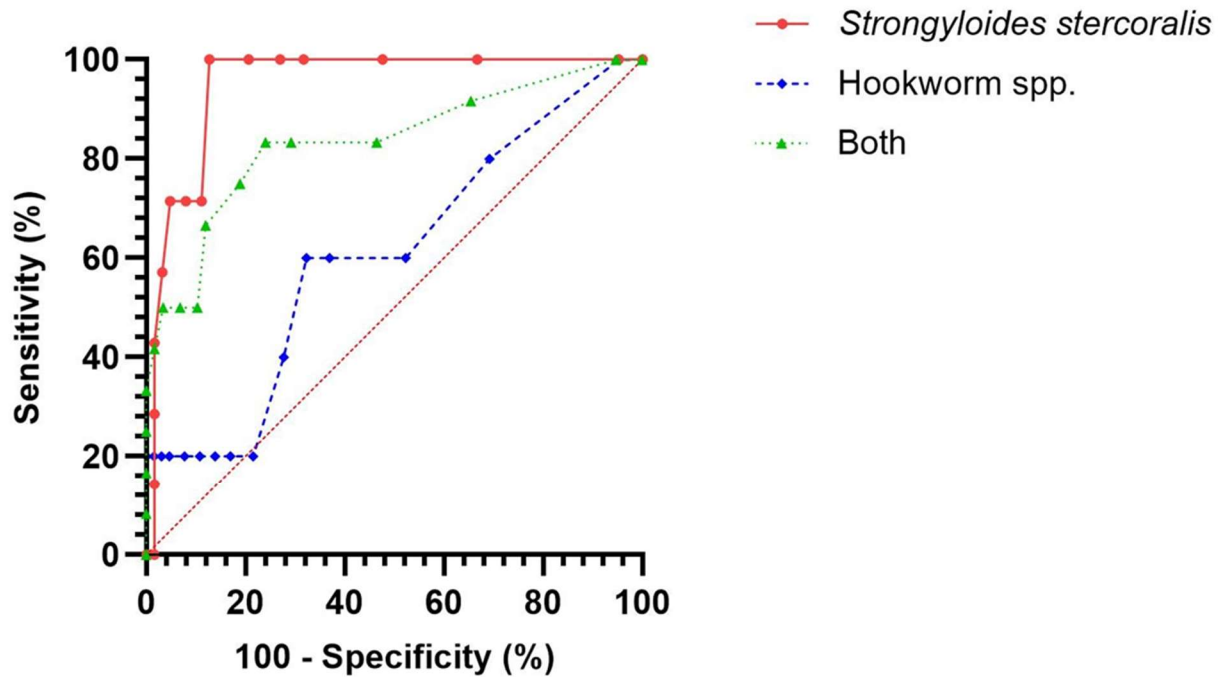

|                       | AUC   | 95% CI      | P value |
|-----------------------|-------|-------------|---------|
| <i>S. stercoralis</i> | 0.950 | 0.897-1.000 | 0.0001  |
| Hookworm              | 0.605 | 0.339 0.870 | 0.438   |
| Both                  | 0.834 | 0.688-0.980 | 0.0003  |

**Supplementary table 1. Forward and reverse primers for PCR of extracted DNA from *Strongyloides stercoralis* pooled larvae.** Primer sequences, expected length of sequence, and annealing temperature shown. Sequences were obtained using conventional PCR for 18S rRNA Highly Variable Regions I and IV.

| Primer name    | Sequence (5'-3')                | Length (bp) | Annealing temp (°C) | Reference |
|----------------|---------------------------------|-------------|---------------------|-----------|
| HVR I Forward  | GCTCATTATAACAGCTATAGACTACACGGTA | 434 approx. | 60                  | 1.        |
| HVR I Reverse  | CCACAACAATCATT T TATGCACTTGG    |             |                     |           |
| HVR IV Forward | CGGGCCGGACACTATAAGG             | 255 approx. | 63                  |           |
| HVR IV Reverse | ATCTCTAAACAGGAACATAATGATCACTAC  |             |                     |           |

1. Barratt, J.L.N., et al., A global genotyping survey of *Strongyloides stercoralis* and *Strongyloides fuelleborni* using deep amplicon sequencing. PLoS Negl Trop Dis, 2019. 13(9): p. e0007609

**Supplementary table 2. *Strongyloides stercoralis* IgG ELISA results.** Table showing number and percentage of positive and negative *S. stercoralis* IgG ELISA results, and mean and median Optical Densities (OD) for each group. Negative results are divided into negatives (OD < 0.185) and high negatives (OD ≥ 0.185 - < 0.200). Positive results are divided into weakly positives (OD ≥ 0.200 - < 0.250), standard positives (OD ≥ 0.250 - < 1.000) and strongly positives (OD ≥ 1.000). OD values were not normally distributed, with a Shapiro-Wilk test significance of < 0.001. Median eosinophil counts, number with eosinophilia and percentage with eosinophilia are shown for each group. Note, eosinophilia totals may not match the total number of serological tests performed as not all participants had a valid differential white cell count available.

|                                          | No. of participants | %           | Mean OD      | Median OD    | Median eosinophil count (10 <sup>9</sup> /L) | No. with eosinophilia (≥ 0.5 x 10 <sup>9</sup> /L) | % with eosinophilia |
|------------------------------------------|---------------------|-------------|--------------|--------------|----------------------------------------------|----------------------------------------------------|---------------------|
| <b>All negative</b>                      | <b>161/248</b>      | <b>64.9</b> | <b>0.098</b> | <b>0.096</b> | <b>0.2</b>                                   | <b>23/148</b>                                      | <b>15.5</b>         |
| Negative (OD < 0.185)                    | 154                 | 62.1        | 0.095        | 0.092        | 0.2                                          | 22/141                                             | 15.6                |
| High Negative (OD ≥ 0.185 - < 0.200)     | 7                   | 2.8         | 0.190        | 0.189        | 0.2                                          | 1/7                                                | 14.3                |
| <b>All positive</b>                      | <b>87/248</b>       | <b>35.1</b> | <b>0.721</b> | <b>0.417</b> | <b>0.5</b>                                   | <b>45/81</b>                                       | <b>55.6</b>         |
| Weakly positive (OD ≥ 0.200 - < 0.250)   | 23                  | 9.3         | 0.227        | 0.230        | 0.2                                          | 5/22                                               | 22.7                |
| Standard positive (OD ≥ 0.250 - < 1.000) | 40                  | 16.1        | 0.489        | 0.396        | 0.5                                          | 21/36                                              | 58.3                |
| Strongly positive (OD ≥ 1.000)           | 24                  | 9.7         | 1.580        | 1.399        | 0.7                                          | 19/23                                              | 82.6                |
| <b>Total</b>                             | <b>248</b>          |             | <b>0.317</b> | <b>0.133</b> | <b>0.3</b>                                   | <b>68/229</b>                                      | <b>29.7</b>         |

**Supplementary table 3. Diagnostic test results in 5 participants with positive/equivocal faecal real-time PCR for hookworm species.** For definitions of semi-quantitative results for faecal PCR and serological results, see manuscript text.

| Age (years) | Years since migration to UK | Eosinophil count (10 <sup>9</sup> /L) | FEA microscopy | Charcoal culture | Real-time PCR | S. <i>stercoralis</i> IgG ELISA OD value | S. <i>stercoralis</i> IgG ELISA result |
|-------------|-----------------------------|---------------------------------------|----------------|------------------|---------------|------------------------------------------|----------------------------------------|
| 31          | 16                          | 0.1                                   | -              | +                | +             | 0.352                                    | ++                                     |
| 21          | 20                          | 4.0                                   | -              | -                | +             | 0.527                                    | ++                                     |
| 20          | 1                           | 0.5                                   | -              | -                | +             | 0.146                                    | -                                      |
| 43          | 3                           | 0.2                                   | -              | -                | equiv         | 0.492                                    | ++                                     |
| 29          | 1                           | 0.6                                   | -              | -                | equiv         | 0.230                                    | +                                      |

**Supplementary table 4. Values for sensitivity and specificity calculations for diagnostic tests for of *Strongyloides stercoralis*.** Using a reference standard of A. Faecal qPCR positive/equivocal result or B. S. *stercoralis* IgG ELISA positive result. 95% confidence intervals shown in brackets.

**A. Faecal qPCR as reference standard**

| qPCR            | Charcoal culture     |          | Microscopy             |          | S. <i>stercoralis</i> IgG ELISA |          |
|-----------------|----------------------|----------|------------------------|----------|---------------------------------|----------|
|                 | Positive             | Negative | Positive               | Negative | Positive                        | Negative |
| Positive        | 2                    | 5        | 1                      | 6        | 7                               | 0        |
| Negative        | 0                    | 67       | 0                      | 67       | 27                              | 38       |
| Sensitivity (%) | 28.6 (3.7 - 71.0)    |          | 14.3% (0.4 - 57.9)     |          | 100.0 (59.0 - 100.0)            |          |
| Specificity (%) | 100.0 (94.6 - 100.0) |          | 100.00 (94.64 - 100.0) |          | 58.5 (45.6 - 70.6)              |          |

**B. *Strongyloides stercoralis* IgG ELISA as reference standard**

| Serology        | Charcoal culture     |          | Microscopy           |          | qPCR                 |          |
|-----------------|----------------------|----------|----------------------|----------|----------------------|----------|
|                 | Positive             | Negative | Positive             | Negative | Positive             | Negative |
| Positive        | 2                    | 32       | 1                    | 33       | 7                    | 27       |
| Negative        | 0                    | 38       | 0                    | 38       | 0                    | 38       |
| Sensitivity (%) | 5.9 (0.7 - 19.7)     |          | 2.9 (0.1 - 15.3)     |          | 20.6 (8.7 - 37.9)    |          |
| Specificity (%) | 100.0 (90.8 - 100.0) |          | 100.0 (90.8 - 100.0) |          | 100.0 (90.7 - 100.0) |          |

**Supplementary table 5. Table of travel to other *Strongyloides stercoralis* endemic regions by study participants.** Number and percentage of participants who travelled to each region is shown, as well as the most frequently travelled to country in each region.

| <i>S. stercoralis</i> endemic region | Number of participants | % (N=244) | Most frequent country | Number | % (N=244) |
|--------------------------------------|------------------------|-----------|-----------------------|--------|-----------|
| Fiji only                            | 84                     | 34.4      |                       |        |           |
| Other:                               | 160                    | 65.6      |                       |        |           |
| Middle East                          | 106                    | 43.4      | Iraq                  | 83     | 34.0      |
| Asia (excluding SE Asia)             | 109                    | 44.7      | Afghanistan           | 99     | 40.6      |
| Southeast Asia                       | 8                      | 3.3       | Brunei                | 4      | 1.6       |
| Sub Saharan Africa                   | 72                     | 25.5      | Kenya                 | 59     | 24.2      |
| North Africa                         | 2                      | 0.8       | Egypt                 | 2      | 0.8       |
| South and Central America            | 26                     | 10.7      | Belize                | 26     | 10.7      |
| Oceania (excluding Fiji)             | 16                     | 6.6       | Australia             | 16     | 6.6       |
| Caribbean                            | 3                      | 1.2       | Barbados              | 3      | 1.2       |
| Southern Europe                      | 69                     | 27.3      | Cyprus                | 50     | 20.5      |

**Supplementary table 6. Table of reported predominant living environment (urban or rural) of study participants.** Numbers are shown for faecal methodologies and *S stercoralis* IgG ELISA.

|                                                 | Rural | Urban | Equal rural/urban |
|-------------------------------------------------|-------|-------|-------------------|
| <i>S. stercoralis</i> faecal positive/equivocal | 6     | 1     | 0                 |
| Hookworm faecal positive/equivocal              | 3     | 2     | 0                 |
| <i>S. stercoralis</i> IgG ELISA positive        | 47    | 31    | 8                 |
| <i>S. stercoralis</i> IgG ELISA negative        | 52    | 98    | 7                 |
| All participants                                | 100   | 129   | 15                |

**Supplementary table 7. Symptomatology of participants shown by number of participants and percentage.** Values are shown for all participants and those with positive diagnostic/equivocal faecal tests for *S. stercoralis* and hookworm spp, and positive *S. stercoralis* IgG ELISA.

|                                                 |            | Any symptoms |      | Gastrointestinal symptoms |            |                 |        | Rashes | Cough / SOB | Unexplained weight loss | Subjective fevers |
|-------------------------------------------------|------------|--------------|------|---------------------------|------------|-----------------|--------|--------|-------------|-------------------------|-------------------|
|                                                 |            | Yes          | No   | Diarrhoea                 | Abdo. pain | Blood in stools | Any GI |        |             |                         |                   |
| All participants                                | Number     | 94           | 150  | 21                        | 20         | 24              | 52     | 42     | 33          | 4                       | 30                |
|                                                 | % of group | 38.5         | 61.5 | 8.6                       | 8.2        | 9.8             | 21.3   | 17.2   | 13.5        | 1.6                     | 12.3              |
| <i>S. stercoralis</i> faecal positive/equivocal | Number     | 7            | 0    | 1                         | 2          | 0               | 3      | 4      | 1           | 1                       | 3                 |
|                                                 | % of group | 100.0        | 0.0  | 14.3                      | 28.6       | 0.0             | 42.9   | 14.3   | 57.1        | 14.3                    | 42.9              |
| Hookworm spp. faecal positive/equivocal         | Number     | 3            | 2    | 2                         | 0          | 0               | 2      | 0      | 1           | 0                       | 1                 |
|                                                 | % of group | 60.0         | 40.0 | 40.0                      | 0.0        | 0.0             | 40.0   | 0.0    | 20.0        | 0.0                     | 20.0              |
| <i>S. stercoralis</i> IgG ELISA positive (any)  | Number     | 49           | 37   | 12                        | 11         | 11              | 27     | 27     | 13          | 2                       | 20                |
|                                                 | % of group | 57.0         | 43.0 | 14.0                      | 12.8       | 12.8            | 31.4   | 31.4   | 15.1        | 2.3                     | 23.3              |



**Supplementary table 8. Logistic regression analyses of association between *S. stercoralis* IgG ELISA positivity, travel to an *S. stercoralis* endemic area and residential environment in Fiji.** Odds ratios (OR) were calculated for each variable individually, including age, and as part of a multiple variable analyses (including age and the reporting of any symptoms). 95% CI shown in brackets.

| Variable                           | Individual variable, no other variables included<br>OR (95% CI) |              | Individual variable, age of participants included |              | All variables (including age and reporting any symptoms) |             |
|------------------------------------|-----------------------------------------------------------------|--------------|---------------------------------------------------|--------------|----------------------------------------------------------|-------------|
|                                    | OR                                                              | P value      | OR                                                | P value      | OR                                                       | P value     |
| Age                                | 1.02 (0.99-1.06)                                                | 0.15         |                                                   |              | 1.01 (0.96-1.05)                                         | 0.80        |
| Travel to other endemic area       | 1.74 (0.98-3.09)                                                | 0.06         | 1.55 (0.78-3.08)                                  | 0.21         | 1.26 (0.60-2.66)                                         | 0.54        |
| <b>Living in rural environment</b> | <b>2.43 (1.42-4.17)</b>                                         | <b>0.001</b> | <b>2.40 (1.40-4.13)</b>                           | <b>0.002</b> | <b>2.04 (1.11-3.74)</b>                                  | <b>0.02</b> |
| Living in medium HDI province      | 2.11 (1.09-4.09)                                                | 0.03         | 1.99 (1.02-3.89)                                  | 0.04         | 1.33 (0.62-2.86)                                         | 0.46        |

**Table 9. Logistic regression analyses of possible associations between *S. stercoralis* IgG ELISA positivity and symptoms.** Odds ratios (OR) were calculated for each variable individually, including age, and as part of a multiple variable analyses. Odds ratios and p values are shown, with 95% confidence intervals (CI) in brackets.

| Variable                  | Individual variable, no other variables included |                  | Individual variable, age of participants included |                  | All variables included  |              |
|---------------------------|--------------------------------------------------|------------------|---------------------------------------------------|------------------|-------------------------|--------------|
|                           | OR<br>95% CI                                     | P<br>value       | OR                                                | P<br>value       | OR                      | P<br>value   |
| Age                       | 1.02 (0.99-1.06)                                 | 0.15             |                                                   |                  | 1.02 (0.98-1.05)        | 0.42         |
| Any symptoms              | 3.30 (1.90-5.71)                                 | <0.001           | 3.17 (1.82-5.52)                                  | <0.001           | 2.43 (0.87-6.78)        | 0.09         |
| GI symptoms (any)         | 2.42 (1.29-4.51)                                 | 0.006            | 2.27 (1.20-4.28)                                  | 0.01             | 1.06 (0.42-2.69)        | 0.90         |
| <b>Rashes</b>             | <b>5.07 (2.45-10.50)</b>                         | <b>&lt;0.001</b> | <b>4.88 (2.35-10.15)</b>                          | <b>&lt;0.001</b> | <b>3.44 (1.43-8.31)</b> | <b>0.006</b> |
| Cough/shortness of breath | 1.22 (0.57-2.59)                                 | 0.61             | 1.17 (0.55-2.50)                                  | 0.69             | 0.42 (0.16-1.12)        | 0.08         |
| Subjective fevers         | 1.96 (0.995-3.87)                                | 0.052            | 1.93 (0.98-3.83)                                  | 0.06             | 1.05 (0.42-2.65)        | 0.92         |
| Weight loss               | 1.85 (0.26-13.33)                                | 0.54             | 1.86 (0.25-13.62)                                 | 0.54             | 2.24 (0.27-18.59)       | 0.46         |

**Participant Questionnaire**

Unique Identifier Number: \_\_\_\_\_

Please only answer questions which you would like to. Answers will remain anonymous. Not answering a question will not have any impact on your training/career or involvement in the study. Please ask an investigator if you need help with a question.

Date of joining the Armed Forces: \_\_\_/\_\_\_/\_\_\_\_\_

Date of arrival in the UK: \_\_\_/\_\_\_/\_\_\_\_\_

Country of birth: \_\_\_\_\_ Town of birth: \_\_\_\_\_

Apart from the UK and your country of birth, have you travelled to/been deployed to any other countries?

Yes/No

If yes, please list these with dates:  
(More paper can be provided if needed)

Country:

Date:

| Country: | Date: |
|----------|-------|
| _____    | _____ |
| _____    | _____ |
| _____    | _____ |
| _____    | _____ |

Before moving to the UK, what was the name of the main City/Town/Village/Area you lived in?

\_\_\_\_\_

Did you live in an urban (town) or a rural (countryside) place, or both equally

\_\_\_\_\_

As far as you know, have you ever been treated for any of the following infections:

|                             |                      | Date/age (approximately): |
|-----------------------------|----------------------|---------------------------|
| Tuberculosis                | Yes/ No / Don't Know | _____                     |
| Gut worms                   | Yes/ No / Don't Know | _____                     |
| Schistosomiasis (Bilharzia) | Yes/ No / Don't Know | _____                     |
| Skin infections/boils       | Yes/ No / Don't Know | _____                     |

Do you have, or have you experienced any of the following medical problems on a persistent (ongoing) basis? A member of the study team may contact you with follow up questions about the symptoms.

Please give any details below:

|                                                   |          |       |
|---------------------------------------------------|----------|-------|
| Repeated or long-term diarrhoea/loose stools      | Yes / No | _____ |
| Blood in stools                                   | Yes / No | _____ |
| Abdominal pains                                   | Yes / No | _____ |
| Blood in urine                                    | Yes / No | _____ |
| Unexplained weight loss                           | Yes / No | _____ |
| Coughing/shortness of breath/difficulty breathing | Yes / No | _____ |
| Fevers                                            | Yes / No | _____ |
| Sweating at night                                 | Yes / No | _____ |
| Rashes                                            | Yes / No | _____ |
| Skin infections/boils                             | Yes / No | _____ |
| Any other symptoms?                               | Yes / No | _____ |

Thank you for agreeing to take part in the study. If you have any questions, please contact:

Dr William Nevin
